# Supplementary material for: Protective α1-antitrypsin effects in autoimmune vasculitis are compromised by methionine oxidation
Source: PubMed Central journal article supplement (PMC9711875; doi:10.1172/jci160089), 2022-12-01
Supplement: jci-132-160089-s098.pdf [file jci-132-160089-s098.pdf]

# Supplemental Figure S1

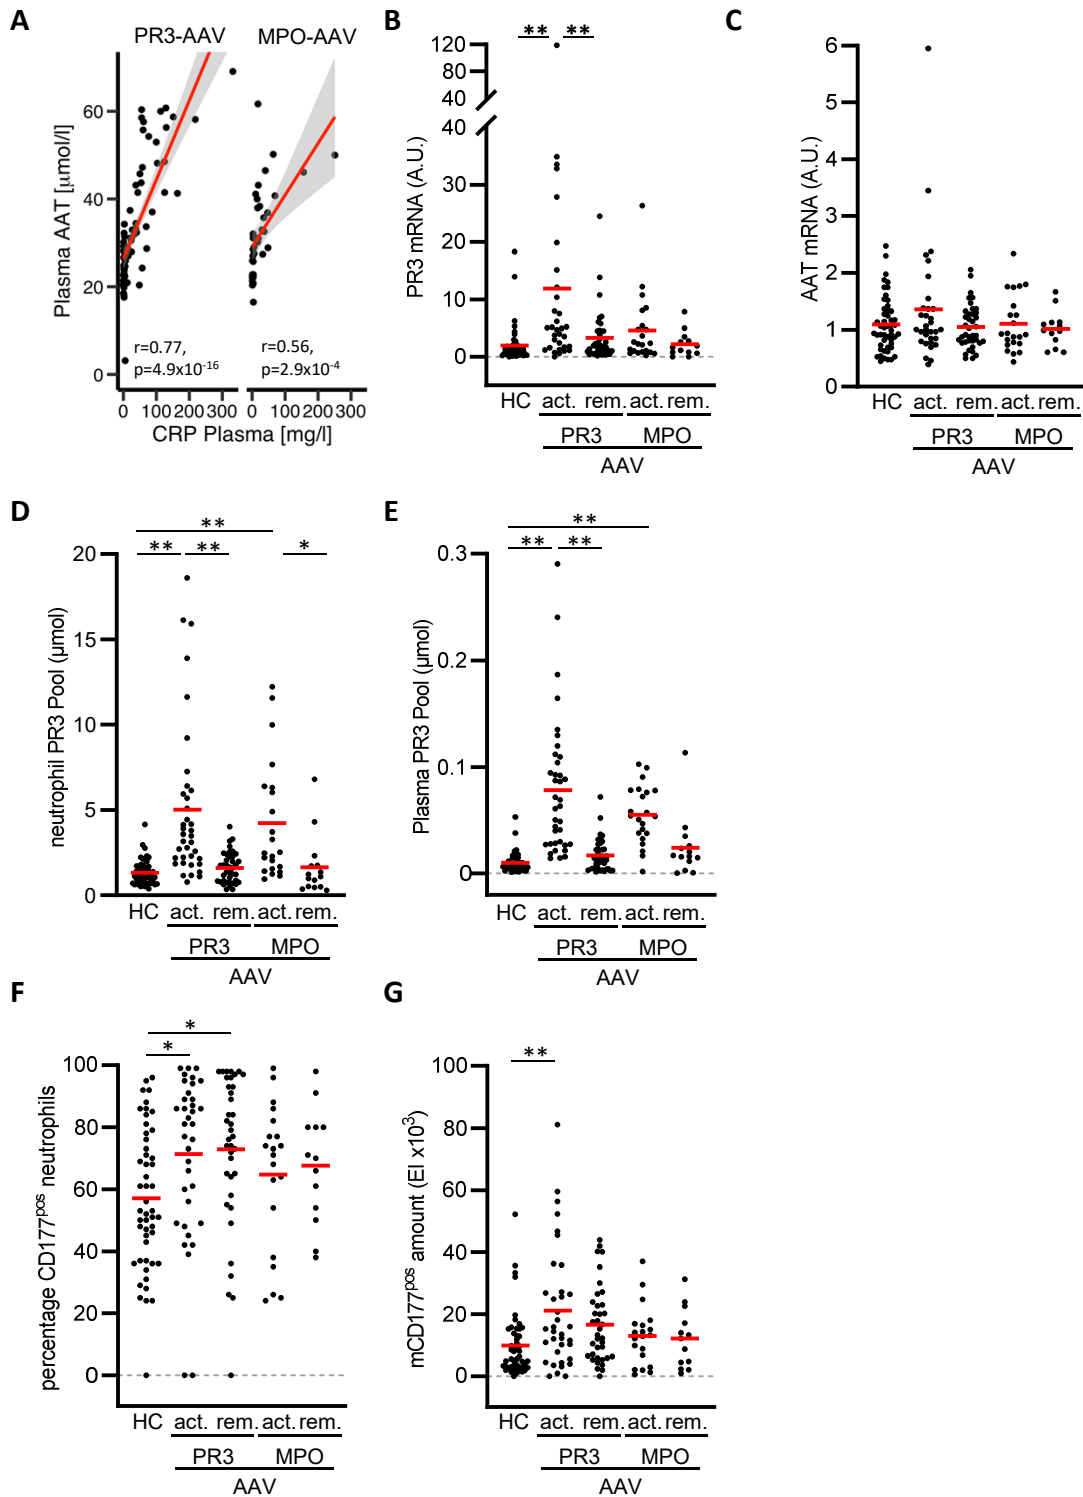

**Supplemental Figure S1 (A)** Plasma AAT correlation with plasma CRP in PR3- and MPO-AAV is illustrated. **(B)** PR3 mRNA and **(C)** AAT mRNA expression ( $n=50, 32, 39, 22, 13$  from left to right) was measured by RT-PCR. **(D)** The neutrophil ( $n=50, 37, 39, 22, 15$  from left to right) and **(E)** plasma PR3 pool was calculated in HC and AAV patients ( $n=50, 37, 39, 22, 16$  from left to right). **(F)** The percentage of mCD177<sup>pos</sup> neutrophils is depicted ( $n=50, 36, 37, 20, 13$  from left to right). **(G)** The mCD177 amount is given as expression index of the mean MFI (MFI EI,  $n=50, 36, 37, 20, 13$  from left to right). Individual results are depicted, and the mean is indicated. One-way ANOVA was performed with Tukey post-hoc testing. \* is  $p < 0.05$ , \*\* is  $p < 0.01$ .

# Supplemental Figure S2

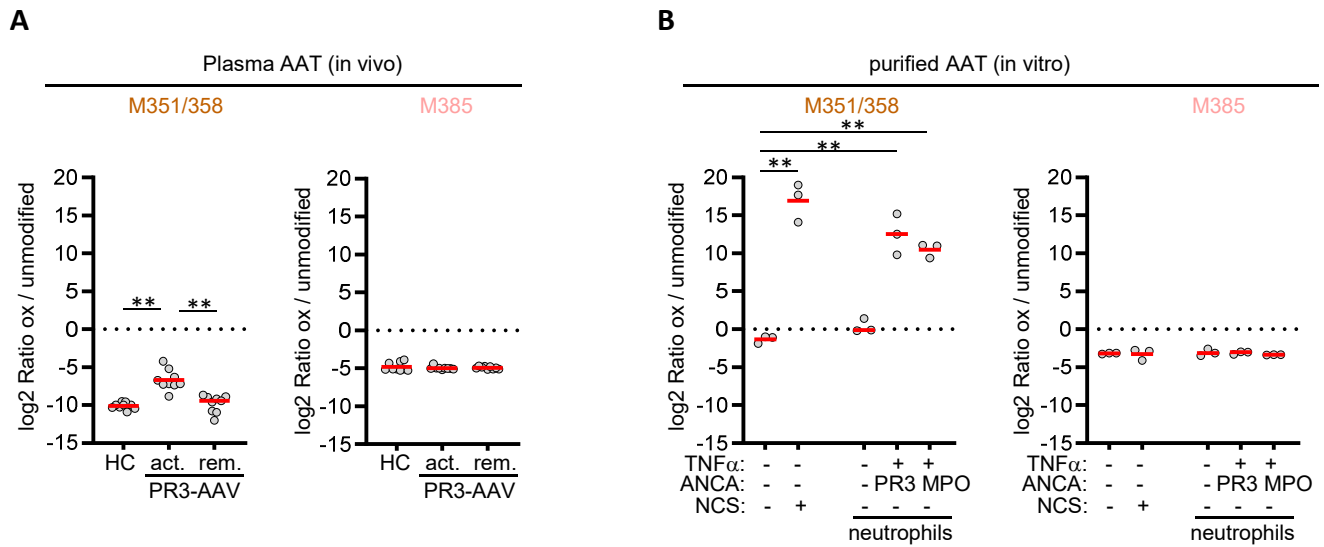

**Supplemental Figure S2. Detection of oxidized M351, M358, and 385 by Parallel Reaction Monitoring (PRM).** Log<sub>2</sub> Ratio between oxidized and unmodified peptide pairs were calculated for **(A)** Plasma AAT (n=9/group), and **(B)** purified AAT (n=3/group). One-way ANOVA was performed with Tukey post-hoc testing. \* is p<0.05, \*\* is p<0.01.

## Supplemental Figure S3

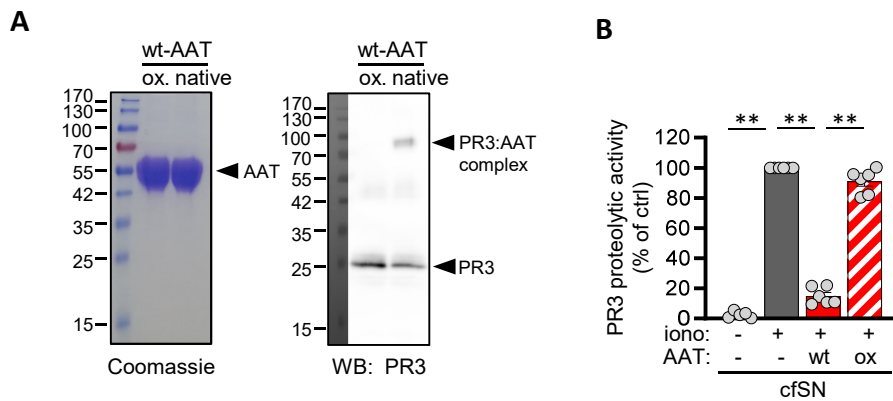

**Supplemental Figure S3. Oxidized AAT does not bind and neutralizes proteolytically active PR3.** wt-AAT was exposed to the oxidant N-chlorosuccinimide (NCS). **(A)** NCS treatment did not result in wt-AAT degradation as shown by electrophoresis and Coomassie staining but reduced complex formation with PR3 shown by anti-PR3 immunoblotting. **(B)** NCS-treated wt-AAT showed strongly reduced PR3 activity inhibition by FRET assay (n=6/group). Individual results and the mean  $\pm$  s.e.m. are given. One-way ANOVA was performed with Tukey post-hoc testing. \* is  $p < 0.05$ , \*\* is  $p < 0.01$ .

## Supplemental Figure S4

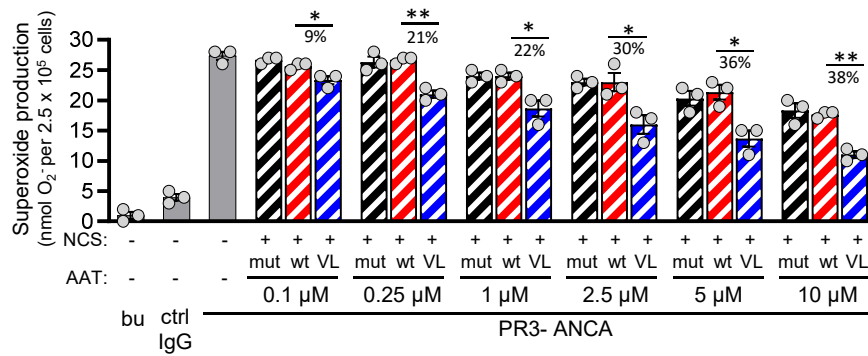

**Supplemental Figure S4, VL- but not wt-AAT inhibits PR3-ANCA-induced respiratory burst in neutrophils even when exposed to a strong oxidant.** Increasing concentrations of NCS-treated VL-AAT concentrations progressively inhibited superoxide release as indicated by the % inhibition (n=3/group), whereas NCS-treated wt-AAT did not differ from mut-AAT). Individual results and the mean  $\pm$  s.e.m. are given. One-way ANOVA within the groups was performed with Tukey post-hoc testing. \* is  $p < 0.05$ , \*\* is  $p < 0.01$ .

## Supplemental Figure S5

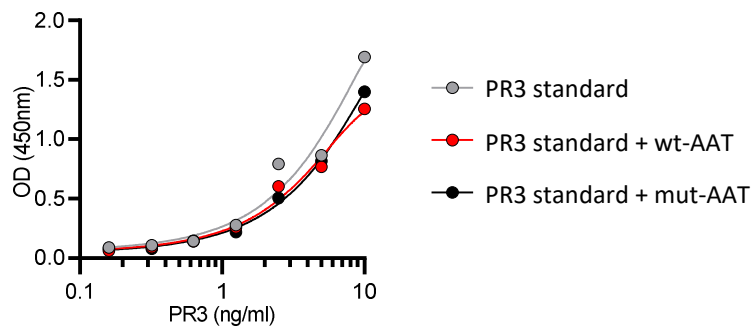

**Supplemental Figure S5. The PR3 ELISA (Elabscience Biotechnology Inc.) detects free and AAT-bound proteinase 3.** Addition of 0.25  $\mu$ M wt- or mut-AAT to the manufacturer's PR3 standard working solution that lacked AAT did not affect PR3 detection.

## Supplemental Figure S6

**A**

Spearman correlation between  
mPR3 amount and plasma AAT

|                                               |
|-----------------------------------------------|
| HC ( $r = -0.32$ , $p = 0.02$ )               |
| active PR3-AAV ( $r = 0.21$ , $p = 0.22$ )    |
| remission PR3-AAV ( $r = 0.35$ , $p = 0.04$ ) |
| active MPO-AAV ( $r = 0.18$ , $p = 0.45$ )    |
| remission MPO-AAV ( $r = 0.08$ , $p = 0.80$ ) |

**B**

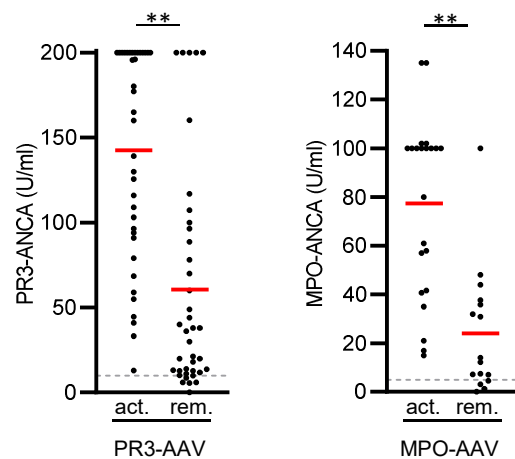

**Supplemental Figure S6. Spearman correlation between mPR3 amount and plasma AAT and PR3- and MPO-ANCA titer in active and remission AAV patients. (A)** The inverse correlation between mPR3 and AAT in HC was compromised in active and remission AAV patients. **(B)** PR3- and MPO-ANCA titer were measured for PR3- (active  $n=37$ , remission  $n=39$ ) and MPO-ANCA patients (active  $n=22$ , remission  $n=16$ ), respectively. Dotted lines represent the upper limit of the normal range. Individual results and the mean are given. Two-tailed Student's t-Test was performed. \* is  $p < 0.05$ , \*\* is  $p < 0.01$ .

# Supplemental Table 1

## Demographic and clinical information of HC and AAV patients

|                                    | Diagnosis |                         |              |                         |                |
|------------------------------------|-----------|-------------------------|--------------|-------------------------|----------------|
|                                    | HC        | active PR3-AAV          | rem. PR3-AAV | active MPO-AAV          | rem. MPO-AAV   |
| n                                  | 50        | 37                      | 39           | 22                      | 16             |
| Age — year                         | 53        | 63                      | 64           | 66                      | 60             |
| Female —no. (%)                    | 27 (54)   | 16 (43)                 | 18 (46)      | 8 (36)                  | 9 (56)         |
| Male —no. (%)                      | 23 (46)   | 21 (57)                 | 21 (54)      | 14 (64)                 | 7 (50)         |
| <b>Disease entity</b>              |           |                         |              |                         |                |
| GPA                                | -         | 37                      | 39           | 0                       | 0              |
| MPA                                | -         | 0                       | 0            | 19                      | 16             |
| EGPA                               | -         | 0                       | 0            | 3                       | 0              |
| <b>Clinical parameters</b>         |           |                         |              |                         |                |
| BVAS (0-63)                        | -         | 17±7                    | 0            | 19±5                    | 0              |
| CRP [mg/l]                         | -         | <b>76.4±64.8*</b>       | 5.9±9.7      | <b>39.5±58.2*</b>       | 8.0 ±<br>14.24 |
| Creatinine [mg/dl]                 | -         | 3.0±2.3                 | 1.4±0.7      | 2.9±2.2                 | 1.8±1.1        |
| Hemoglobin [g/dl]                  | -         | 9.9±2.1                 | 13.6±1.3     | 10.4±1.5                | 12.9± 1.9      |
| Hematokrit [%]                     | -         | <b>30±6<sup>^</sup></b> | 41±4         | <b>31±4<sup>^</sup></b> | 38±5           |
| Leukocytes [/nl]                   | -         | 13.6±6.0                | 8.4±2.3      | 10.7±4.3                | 8.4±2.8        |
| Neutrophils [/nl]                  | -         | <b>11.4±5.7*</b>        | 5.9±2.1      | <b>7.6±3.5*</b>         | 5.6±2.3        |
| Platelets [/nl]                    | -         | 427±214                 | 271± 86      | 347±108                 | 277± 82        |
| <b>Organ involvement - no. (%)</b> |           |                         |              |                         |                |
| Kidney                             | -         | 28 (76)                 | -            | 18 (82)                 | -              |
| Lung                               | -         | 25 (68)                 | -            | 10 (45)                 | -              |
| Ear/Nose/Throat                    | -         | 20 (54)                 | -            | 4 (18)                  | -              |
| Muscle/Joints                      | -         | 12 (32)                 | -            | 3 (14)                  | -              |
| Skin/Mouth/Eyes                    | -         | 11 (30)                 | -            | 0 (0)                   | -              |
| Central nervous system             | -         | 6 (16)                  | -            | 5 (23)                  | -              |

Data are presented as no or mean ± SD.

\* indicates a significant difference between active PR3-AAV and active MPO-AAV as measured by two-tailed t-test.

<sup>^</sup> indicates a significant difference between active AAV and their corresponding remission group as measured by two-tailed t-test.

NA = not applicable

## Supplemental Table 2

### Peptides used in PRM analysis

| Peptide sequence               | m/z        | Charge State | Analytical Group    |
|--------------------------------|------------|--------------|---------------------|
| GTEAAGAMFLEAIPMSIPPEVK         | 753.71821  | 3            | unmodified M351/358 |
| GTEAAGA(ox)MFLEAIP(ox)MSIPPEVK | 764.38148  | 3            | oxidized M351/358   |
| SPLFMGK                        | 390.20965  | 2            | unmodified M385     |
| SPLF(ox)MGK                    | 398.207107 | 2            | oxidized M385       |
| AVLTIDEK                       | 444.755475 | 2            | unmodified control  |
| VFSNGADLSGVTEEEAPLK            | 917.465081 | 2            | unmodified control  |
| ITPNLAEFAFSLYR                 | 821.435398 | 2            | unmodified control  |
| LSITGTYDLK                     | 555.805697 | 2            | unmodified control  |
| QINDYVEK                       | 504.753464 | 2            | unmodified control  |
| SASLHLPK                       | 426.750527 | 2            | unmodified control  |
| SVLGQLGITK                     | 508.310949 | 2            | unmodified control  |
